# Supplementary material for: Tunable reflectance of an inverse opal–chiral nematic liquid crystal multilayer device by electric- or thermal-control
Source: Royal Society of Chemistry journal article supplement (doi:10.1039/c7cp01634d), 2017-01-01
Supplement: c7cp01634d1.pdf [file c7cp01634d1.pdf]

## Supporting Information

### Tunable Reflectance of Inverse Opal-Chiral nematic Liquid Crystal-Multilayer Device by Electric-/Thermal-Control

Yuxian Zhang,<sup>a</sup> Weidong Zhao,<sup>a</sup> Jiahui Wen,<sup>a</sup> Jinming Li,<sup>a</sup> Zhou Yang,<sup>\*a</sup> Dong Wang,<sup>a\*</sup> Hui Cao,<sup>a</sup> and Maohua Quan<sup>b</sup>

<sup>a</sup> Department of Materials Science and Engineering, University of Science and Technology Beijing, 100083, China

<sup>b</sup> Institute for Advanced Materials and Technology, University of Science and Technology Beijing, 100083, China.

\*Corresponding authors:

E-mail Address: yangz@ustb.edu.cn (Z. Yang), wangdong@ustb.edu.cn (D. Wang)

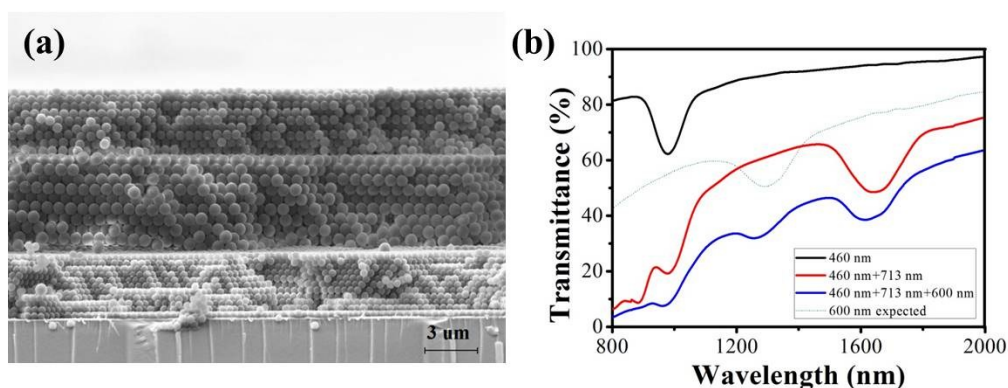

**Fig. S1** (a) SEM image of trilayer opal and (b) transmission spectra measured during the process of layer-by-layer assembly of trilayer opal. The trilayer opal was fabricated from PS spheres of 460 nm-713 nm-600 nm (460 nm at the bottom and 600 nm on the top).

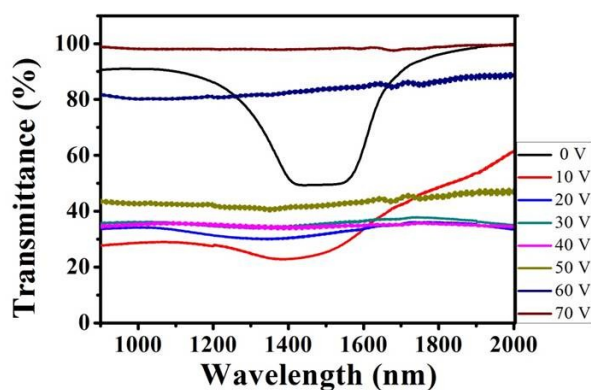

**Fig. S2** Transmission spectra of N\*LC-cell applied with electric field.

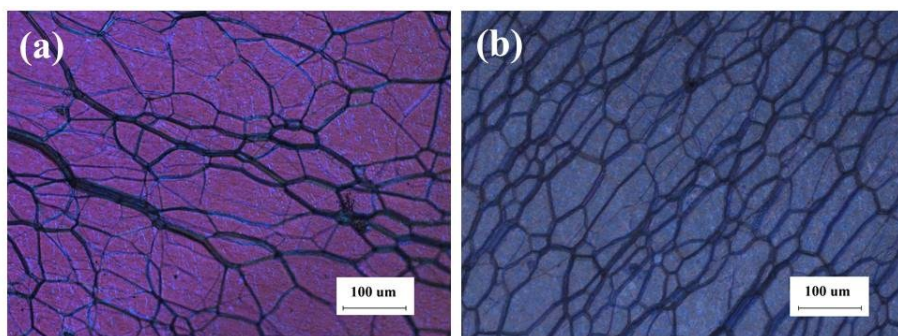

**Fig. S3** POM images of monolayer-IOP-N\*LC (a) at initial state when the electric field was not applied (a) after the electric-field was removed and a pressure was imposed upon the cell.

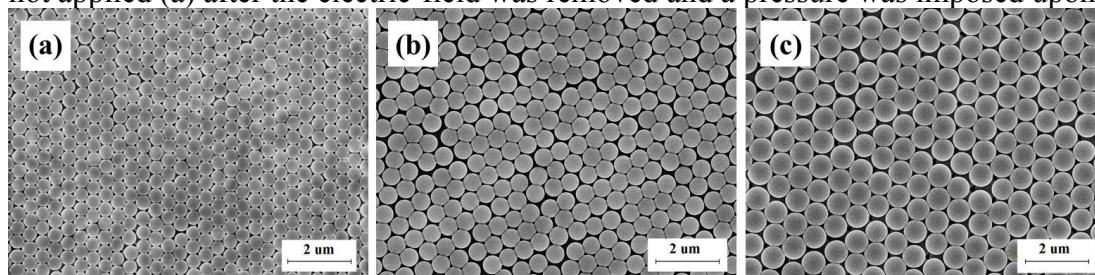

**Fig. S4** SEM images of monolayer opals fabricated from PS spheres with different diameters (a) 460 nm (b) 600 nm (c) 713 nm.

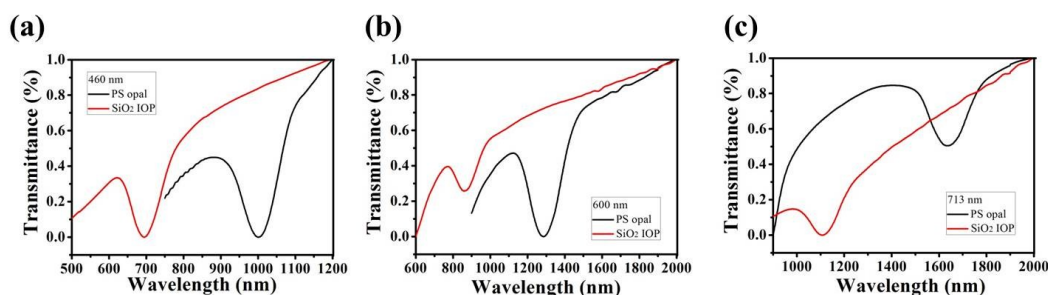

**Fig. S5** Transmission spectra of monolayer  $\text{SiO}_2$  IOP compared with corresponding monolayer PS opal.

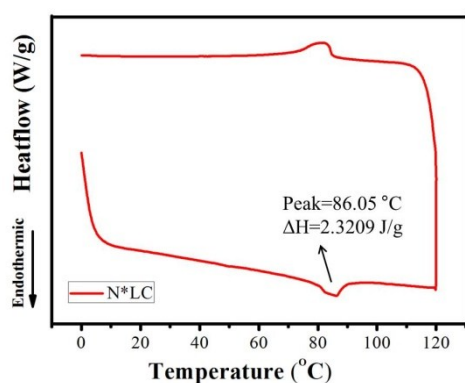

**Fig. S6** DSC of N\*LC heating and cooling traces at  $10\text{ }^{\circ}\text{C min}^{-1}$ .
